# Supplementary material for: Urinary calprotectin, NGAL, and KIM-1 in the differentiation of primarily inflammatory vs. non-inflammatory stable chronic kidney diseases
Source: PubMed Central journal article supplement (PMC7939572; doi:10.1080/0886022x.2021.1885442), 2021-03-04
Supplement: IRNF_A_1885442_SM0688.pdf [file IRNF_A_1885442_SM0688.pdf]

# Supplements

## Supplements Figure 1

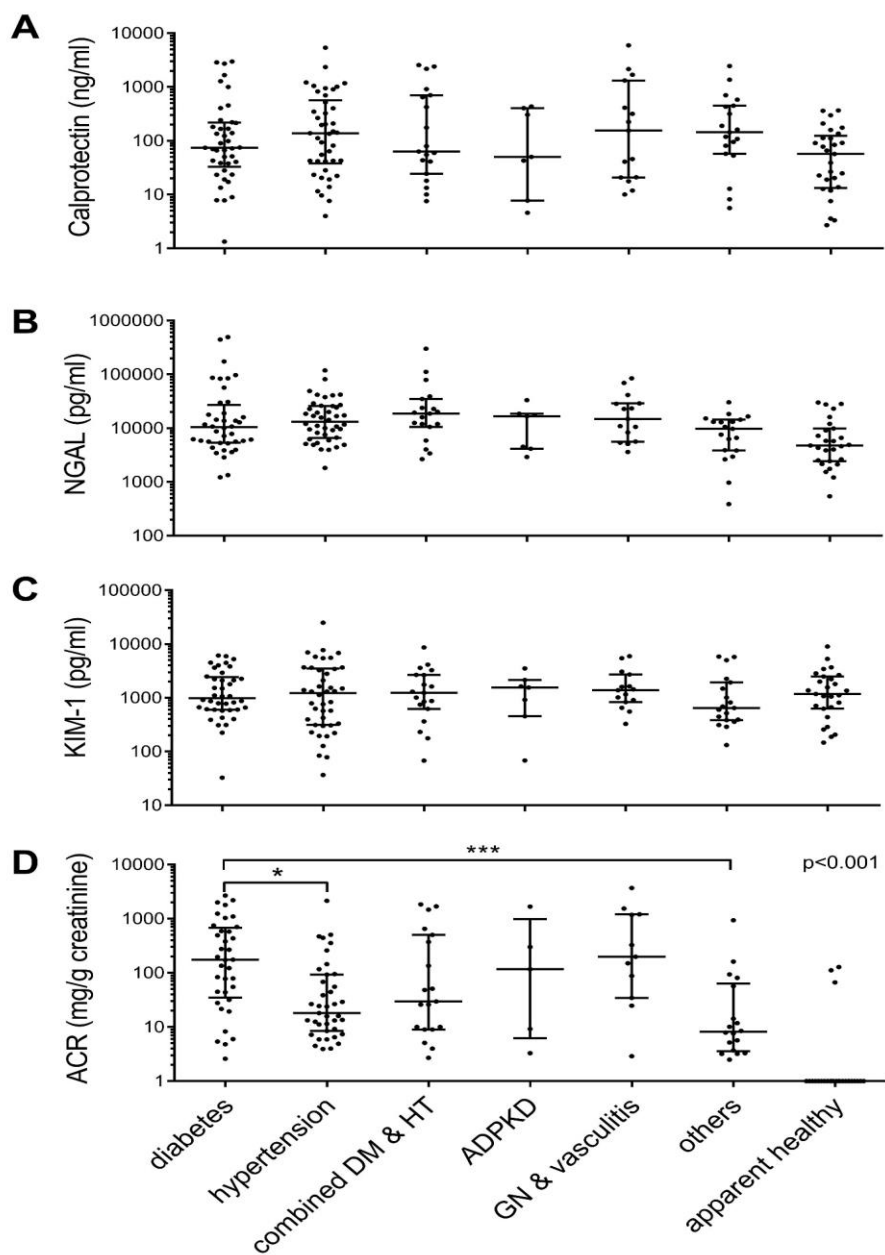

### Figure Legend

**Figure 1:** Individual urinary (A) calprotectin, (B) NGAL, (C) KIM-1 and (D) albumin concentrations in healthy controls and the overall CKD population. Data are presented as scatter plots (logarithmic Y-axis, medians are indicated by horizontal lines). Significant differences between the shown groups were \*\*\* $P < 0.001$  and \* $P < 0.05$  by Kruskal-Wallis test

and Dunn's multiple comparison test. DM – diabetes mellitus; HT – hypertension; GN – glomerulonephritis; ADPKD – autosomal-dominant polycystic kidney disease.
